# Supplementary material for: The NR2F2-HAND2 signaling axis regulates progesterone actions in the uterus at early pregnancy
Source: PubMed Central journal article supplement (PMC10473531; doi:10.3389/fendo.2023.1229033), 2023-08-18

Figure S1

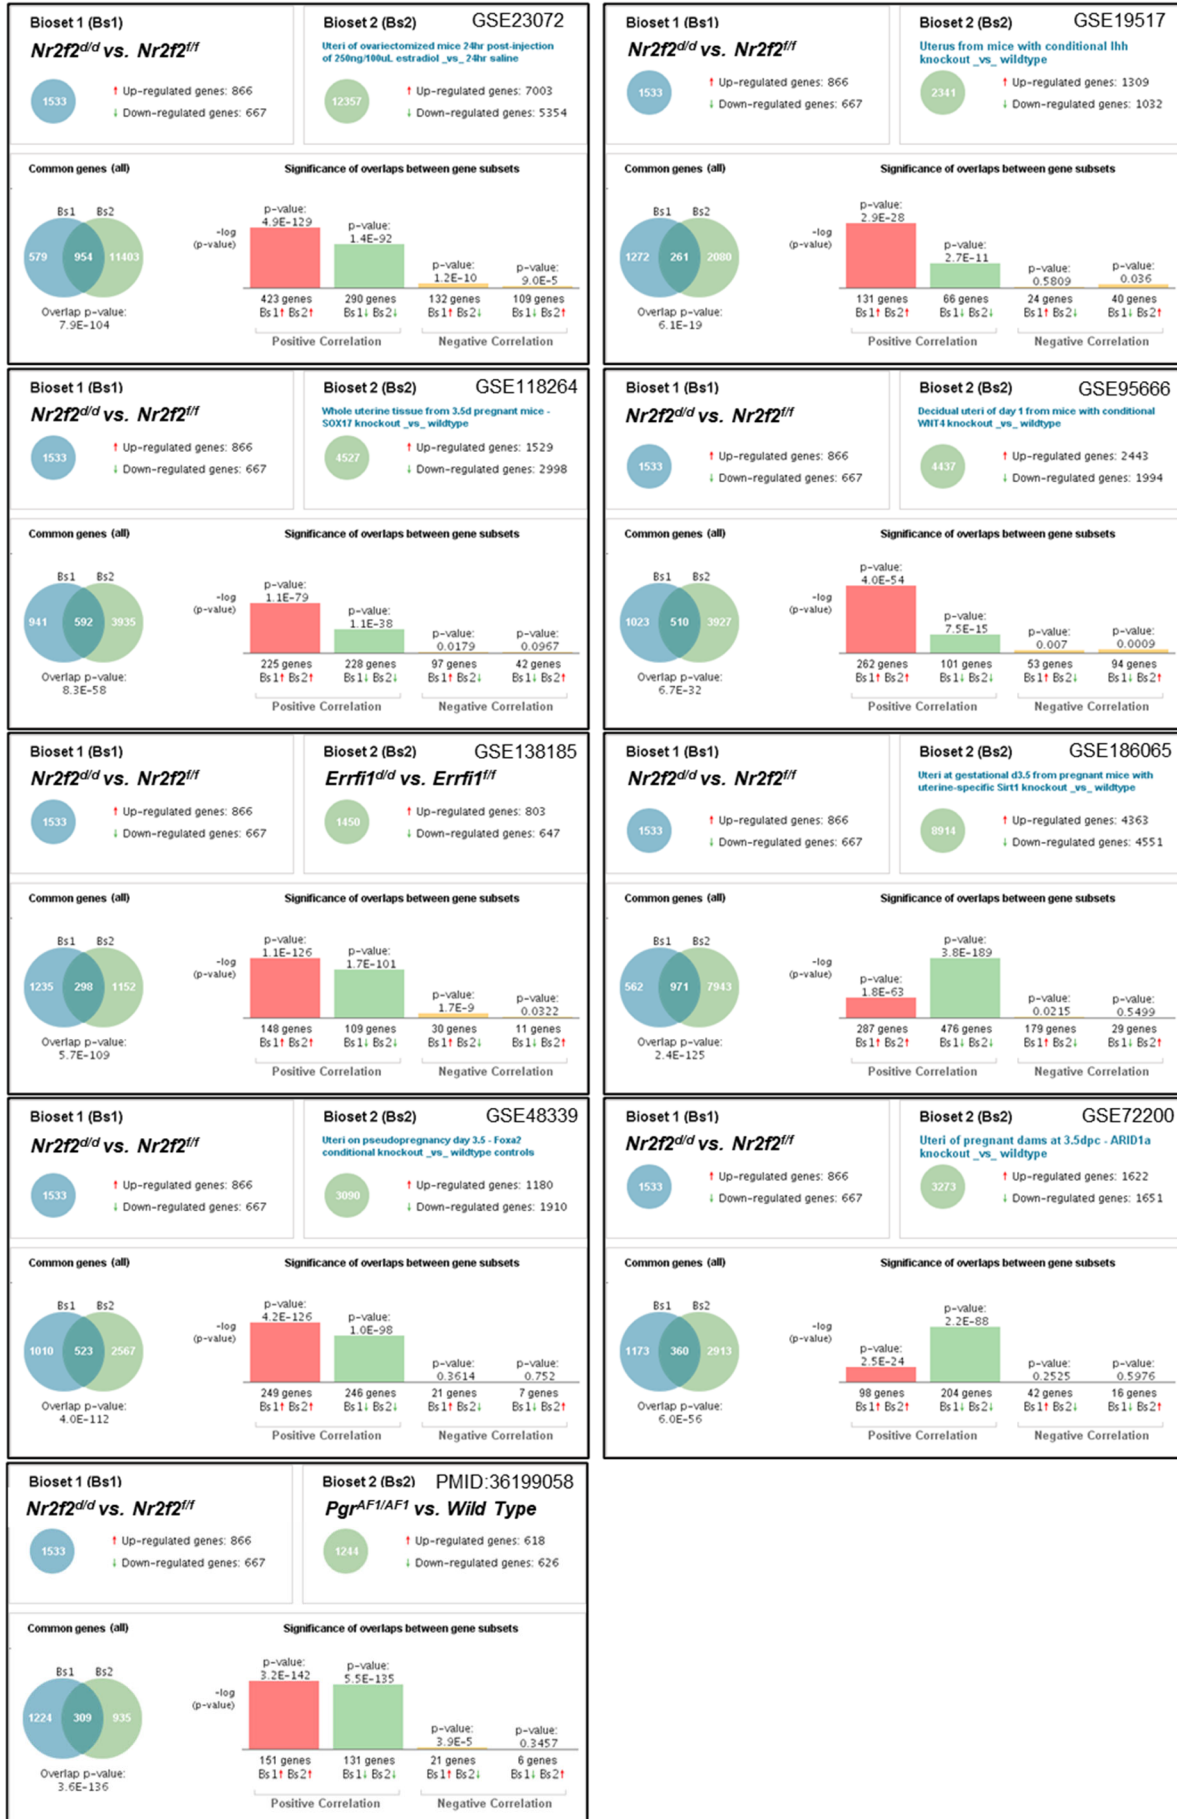

Figure S2

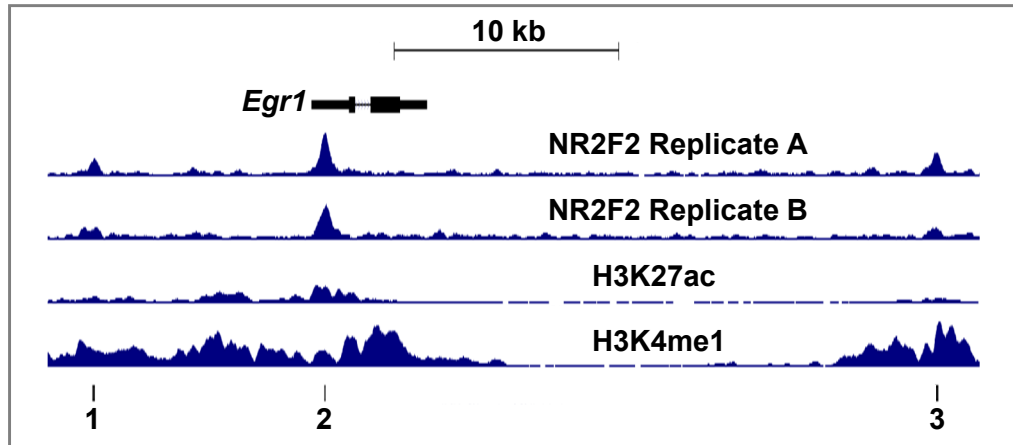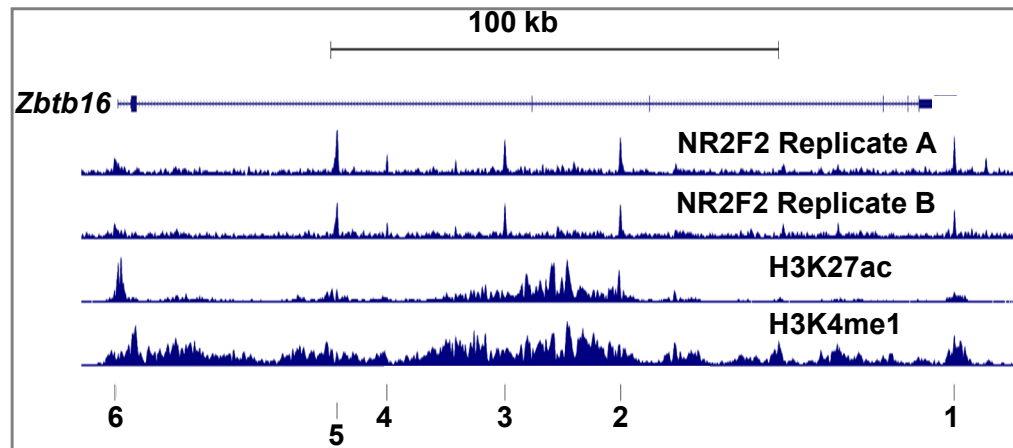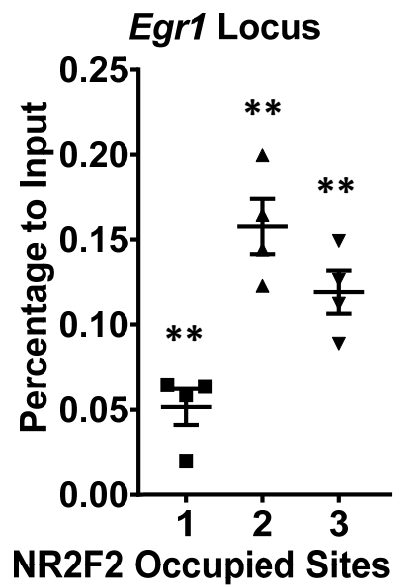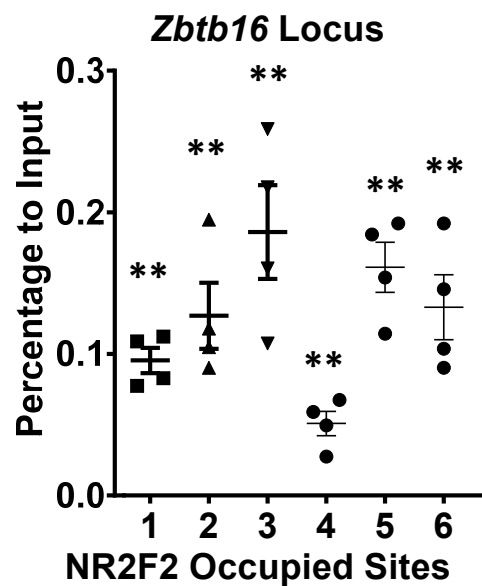

Figure S3

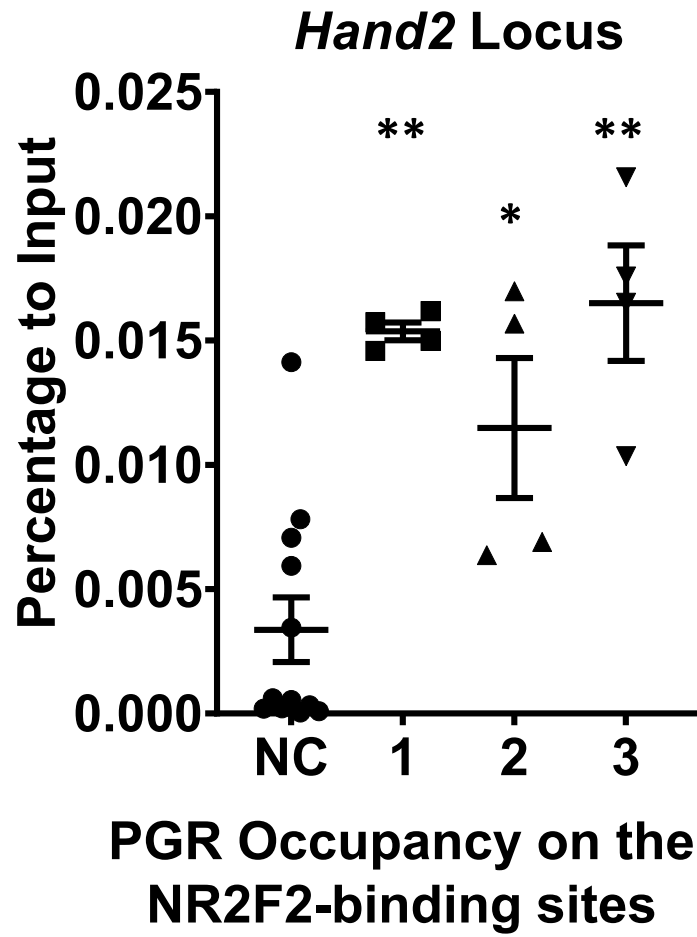

Supplement: DataSheet_6.pdf [file DataSheet_6.pdf]
