# Supplementary material for: The NR2F2-HAND2 signaling axis regulates progesterone actions in the uterus at early pregnancy
Source: Front Endocrinol (Lausanne). 2023 Aug 18;14:1229033. doi: 10.3389/fendo.2023.1229033 (PMC10473531; doi:10.3389/fendo.2023.1229033)
Supplement: Supplementary file 5 [file DataSheet_5.xlsx]

## Sheet: Table S1
Table S1. Information of probes and primers used for RT-qPCR.
Gene symbol	Probe	Vendor	Species
Nr2f2	Mm00772789_m1	Thermo Fisher Scientific	Mouse
Pgr	Mm00435625_m1	Thermo Fisher Scientific	Mouse
Hand2	Mm00439247_m1	Thermo Fisher Scientific	Mouse
Fgf1	Mm00438906_m1	Thermo Fisher Scientific	Mouse
Fgf18	Mm00433286_m1	Thermo Fisher Scientific	Mouse
Ihh	Mm00439613_m1	Thermo Fisher Scientific	Mouse
Sox17	Mm00488363_m1	Thermo Fisher Scientific	Mouse
Foxa2	Mm00839704_mH	Thermo Fisher Scientific	Mouse
Arid1a	Mm00473838_m1	Thermo Fisher Scientific	Mouse
	Forward	Reverse
HAND2	5’-GCCAAGGACGACCAGAATGG-3’	5’-GGTTTTCTTGTCGTTGCTGCT-3’	Human

## Sheet: Table S2
Table S2. Information of antibodies used for immunohistochemistry.
Antibody	Cat. no.	Vendor	Host species	Dilution factor
COUP-TFII	#6434	Cell Signaling Technology	Rabbit	1:1000
PGR	#8757	Cell Signaling Technology	Rabbit	1:5000
HAND2	sc-9409	Santa Cruz Biotechnology	Goat	1:5000
KI67	ab15580	Abcam	Rabbit	1:5000
FOXA2	#8186	Cell Signaling Technology	Rabbit	1:1000
ARID1A	#12354	Cell Signaling Technology	Rabbit	1:5000

## Sheet: Table S3
Table S3. Primer sequences used for ChIP-qPCR.
Gene symbol	Target	Forward primer	Reverse primer
Hand2	Peak 1	CACGCTCTTACCCTGTCCTC	GGAGGCTTGCTTTGTTCAGT
	Peak 2	GGGTCAAAAAGCCTTTCTCC	CAGAGACGCCCCAAGAGTAT
	Peak 3	CCACCTCAGTTCCTCCATCT	GCCTGTAAAATGTTTGGCACT
Zbtb16	Peak 1	CAGCCTGAGAACGCTCCT	TGCCCTAGAGGCAGTTCC
	Peak 2	ACACAGCTCCTTGAGGGAAG	AGGCCACGGTGTACAGTTTT
	Peak 3	CCGTTGACTGGTTGACCTTT	GGCCTTTCTCACCTTTCTCA
	Peak 4	CATGACTTCCAGGTGCACAG	CAGCTGCAGAGGACAGAATG
	Peak 5	TCATGGGACTGTTCTTGCAC	TTGTTTTGGCCAAGGTTCTC
	Peak 6	CTCATCCTTCTGACCCCTTG	CTCGTTGGCTAGGTGGAGAG
Egr1	Peak 1	GACCCTCCTGGCTTTCCTAC	GATGCCCTTTTCTTCCTCAA
	Peak 2	CCAAATGTCTTGGCCTCAGT	GCCCTGACCTGAGCCTCTAC
	Peak 3	CCTGCCAAGGAGGGGAAC	GAGAAAATGGGGCAGATGAA

## Sheet: Table S4
Table S4. Guide RNA expression vectors
Name	Cat. no.	Vendor	gRNA sequence
gRNA48	VB210824-1291sua	Vector Builder	GCTCTCTTACGCAGTAGACG
gRNA49	VB210824-1290ahk	Vector Builder	TCGGTGCTGTGTAGTCGGCG
Non-Targeting	VB191117-1500trj	Vector Builder	GCACTACCAGAGCTAACTCA
